# Supplementary material for: Making the Most of 3D Electron Diffraction: Best Practices to Handle a New Tool
Source: MDPI journal article supplement (doi:10.3390/sym15081555), 2023-08-08
Supplement: s1 [file s1]

## Supplementary Crystallographic Tables

Table S1: Trehalose.

| Dataset name                                          | Trehalose anhydrous (RT)                                                                             | Trehalose anhydrous (100K)                                                                           | Trehalose anhydrous (100K, high dose)                                                                | Trehalose dihydrate (100K)                                                                           | Trehalose anhydrous (monoclinic, RT)            |
|-------------------------------------------------------|------------------------------------------------------------------------------------------------------|------------------------------------------------------------------------------------------------------|------------------------------------------------------------------------------------------------------|------------------------------------------------------------------------------------------------------|-------------------------------------------------|
| <u>Crystal data</u>                                   |                                                                                                      |                                                                                                      |                                                                                                      |                                                                                                      |                                                 |
| Chemical formula                                      | C <sub>12</sub> H <sub>22</sub> O <sub>11</sub>                                                      | C <sub>12</sub> H <sub>22</sub> O <sub>11</sub>                                                      | C <sub>12</sub> H <sub>22</sub> O <sub>11</sub>                                                      | C <sub>12</sub> H <sub>22</sub> O <sub>11</sub> ·2(H <sub>2</sub> O)                                 | C <sub>12</sub> H <sub>22</sub> O <sub>11</sub> |
| M <sub>r</sub>                                        | 342.30                                                                                               | 342.30                                                                                               | 342.30                                                                                               | 378.33                                                                                               | 342.30                                          |
| Crystal system, space group                           | Orthorhombic, <i>P</i> <sub>2</sub> <sub>1</sub> <sub>2</sub> <sub>1</sub> <sub>2</sub> <sub>1</sub> | Orthorhombic, <i>P</i> <sub>2</sub> <sub>1</sub> <sub>2</sub> <sub>1</sub> <sub>2</sub> <sub>1</sub> | Orthorhombic, <i>P</i> <sub>2</sub> <sub>1</sub> <sub>2</sub> <sub>1</sub> <sub>2</sub> <sub>1</sub> | Orthorhombic, <i>P</i> <sub>2</sub> <sub>1</sub> <sub>2</sub> <sub>1</sub> <sub>2</sub> <sub>1</sub> | Monoclinic, <i>P</i> <sub>2</sub> <sub>1</sub>  |
| Collection temperature (K)                            | 293                                                                                                  | 100                                                                                                  | 100                                                                                                  | 100                                                                                                  | 293                                             |
| Transfer temperature (K)                              | 293                                                                                                  | 293                                                                                                  | 293                                                                                                  | 100                                                                                                  | 293                                             |
| a, b, c (Å)                                           | 6.8 (4), 11.6 (4), 18.5 (3)                                                                          | 6.7 (5), 11.6 (4), 18.5 (3)                                                                          | 6.8 (3), 11.6 (2), 18.5 (2)                                                                          | 7.50 (6), 12.08 (10), 17.67 (7)                                                                      | 6.75 (6), 8.19 (5), 12.94 (9)                   |
| α, β, γ (°)                                           | 90, 90, 90                                                                                           | 90, 90, 90                                                                                           | 90, 90, 90                                                                                           | 90, 90, 90                                                                                           | 90, 98.3 (2), 90                                |
| V (Å <sup>3</sup> )                                   | 1457 (103)                                                                                           | 1442 (128)                                                                                           | 1447 (79)                                                                                            | 1602 (19)                                                                                            | 708 (9)                                         |
| Z                                                     | 4                                                                                                    | 4                                                                                                    | 4                                                                                                    | 4                                                                                                    | 2                                               |
| Radiation type                                        | Electrons, λ = 0.0251 Å                                                                              | Electrons, λ = 0.0251 Å                         |
| <u>Data collection and processing</u>                 |                                                                                                      |                                                                                                      |                                                                                                      |                                                                                                      |                                                 |
| Diffractometer                                        | Rigaku XtaLAB Synergy-ED                                                                             | Rigaku XtaLAB Synergy-ED                                                                             | Rigaku XtaLAB Synergy-ED                                                                             | Rigaku XtaLAB Synergy-ED                                                                             | Rigaku XtaLAB Synergy-ED                        |
| measured, independent, observed                       | 6114, 2595, 980                                                                                      | 5994, 2324, 985                                                                                      | 6043, 2327, 1302                                                                                     | 8500, 2835, 1758                                                                                     | 3714, 2251, 1280                                |
| Resolution (Å)                                        | 0.80                                                                                                 | 0.80                                                                                                 | 0.80                                                                                                 | 0.80                                                                                                 | 0.80                                            |
| Completeness (%)                                      | 86.7                                                                                                 | 79.1                                                                                                 | 78.7                                                                                                 | 84.6                                                                                                 | 75.6                                            |
| Redundancy                                            | 4.0                                                                                                  | 4.4                                                                                                  | 4.4                                                                                                  | 5.3                                                                                                  | 3.2                                             |
| R <sub>int</sub>                                      | 0.189                                                                                                | 0.193                                                                                                | 0.126                                                                                                | 0.227                                                                                                | 0.132                                           |
| R <sub>pim</sub>                                      | 0.116                                                                                                | 0.113                                                                                                | 0.075                                                                                                | 0.114                                                                                                | 0.104                                           |
| CC <sub>1/2</sub>                                     | 0.992                                                                                                | 0.993                                                                                                | 0.997                                                                                                | 0.970                                                                                                | 0.977                                           |
| I/σ(I) [inf - 0.80 Å]                                 | 3.86                                                                                                 | 4.45                                                                                                 | 6.11                                                                                                 | 5.18                                                                                                 | 5.08                                            |
| Total electron dose (e <sup>-</sup> /Å <sup>2</sup> ) | 0.18                                                                                                 | 0.18                                                                                                 | 0.54                                                                                                 | 0.18                                                                                                 | 0.18                                            |
| Min, Max collection angle (°)                         | -50, +50                                                                                             | -50, +50                                                                                             | -50, +50                                                                                             | -60, +60                                                                                             | -60, +60                                        |

|                                                                   |              |              |              |              |              |
|-------------------------------------------------------------------|--------------|--------------|--------------|--------------|--------------|
| $(\sin \theta/\lambda)_{\max}$ ( $\text{\AA}^{-1}$ )              | 0.625        | 0.624        | 0.625        | 0.625        | 0.624        |
| Detector distance<br>(mm)                                         | 653          | 653          | 653          | 653          | 653          |
| <i>Refinement</i>                                                 |              |              |              |              |              |
| $R_1$ ,<br>$wR_2$ [ $F^2 > 2\sigma(F^2)$ ]                        | 0.117, 0.258 | 0.117, 0.294 | 0.106, 0.255 | 0.124, 0.280 | 0.129, 0.316 |
| $R_1$ , $wR_2$ [all]                                              | 0.237, 0.319 | 0.216, 0.351 | 0.169, 0.285 | 0.174, 0.312 | 0.170, 0.346 |
| S                                                                 | 1.01         | 1.04         | 1.19         | 1.09         | 1.22         |
| No. of reflections                                                | 2595         | 2324         | 2327         | 2835         | 2251         |
| No. of parameters                                                 | 217          | 239          | 216          | 269          | 232          |
| No. of restraints                                                 | 177          | 332          | 178          | 335          | 189          |
| $\Delta\rho_{\max}$ , $\Delta\rho_{\min}$ ( $e \text{\AA}^{-3}$ ) | 0.11, -0.12  | 0.12, -0.15  | 0.13, -0.12  | 0.13, -0.15  | 0.15, -0.14  |
| CCDC number                                                       | -            | -            | 2267656      | 2267657      | 2267654      |

Table S2: Tyrosine.

| Dataset name                                          | Tyrosine (initial)                                    | Tyrosine (full kinematical)                           | Tyrosine (L, CAP)                                     | Tyrosine (D, CAP)                                     | Tyrosine (L, PETS2)                                   | Tyrosine (D, PETS2)                                   |
|-------------------------------------------------------|-------------------------------------------------------|-------------------------------------------------------|-------------------------------------------------------|-------------------------------------------------------|-------------------------------------------------------|-------------------------------------------------------|
| <u>Crystal data</u>                                   |                                                       |                                                       |                                                       |                                                       |                                                       |                                                       |
| Chemical formula                                      | C <sub>9</sub> H <sub>11</sub> NO <sub>3</sub>        |
| M <sub>r</sub>                                        | 181.2                                                 | 181.2                                                 | 181.2                                                 | 181.2                                                 | 181.2                                                 | 181.2                                                 |
| Crystal system,                                       | Orthorhombic,                                         | Orthorhombic,                                         | Orthorhombic,                                         | Orthorhombic,                                         | Orthorhombic,                                         | Orthorhombic,                                         |
| space group                                           | <i>P</i> 2 <sub>1</sub> 2 <sub>1</sub> 2 <sub>1</sub> |
| Temperature (K)                                       | 293                                                   | 293                                                   | 293                                                   | 293                                                   | 293                                                   | 293                                                   |
| a, b, c (Å)                                           | 5.85 (10),<br>6.97 (18),<br>21.24 (10)                |
| V (Å <sup>3</sup> )                                   | 866 (27)                                              | 866 (27)                                              | 866 (27)                                              | 866 (27)                                              | 866 (27)                                              | 866 (27)                                              |
| Z                                                     | 4                                                     | 4                                                     | 4                                                     | 4                                                     | 4                                                     | 4                                                     |
| Radiation type                                        | Electrons,<br>λ = 0.0251 Å                            |
| <u>Data collection and processing</u>                 |                                                       |                                                       |                                                       |                                                       |                                                       |                                                       |
| Diffractometer                                        | Rigaku XtaLAB<br>Synergy-ED                           |
| Processing program                                    | CrysAlis <sup>Pro</sup>                               | CrysAlis <sup>Pro</sup>                               | CrysAlis <sup>Pro</sup>                               | CrysAlis <sup>Pro</sup>                               | PETS2                                                 | PETS2                                                 |
| Processed data type                                   | Merged intensities                                    | Merged intensities                                    | Virtual frame intensities                             | Virtual frame intensities                             | Virtual frame intensities                             | Virtual frame intensities                             |
| measured, independent, observed                       | 4026,<br>1550,<br>1102                                | 4026,<br>1550,<br>1102                                | 11915,<br>2680,<br>1337                               | 11915,<br>2680,<br>1337                               | 11488,<br>2593,<br>1690                               | 11488,<br>2593,<br>1690                               |
| R <sub>int</sub>                                      | 0.084                                                 | 0.084                                                 | -                                                     | -                                                     | -                                                     | -                                                     |
| CC <sub>1/2</sub>                                     | 0.994                                                 | 0.994                                                 | -                                                     | -                                                     | -                                                     | -                                                     |
| Total electron dose (e <sup>-</sup> /Å <sup>2</sup> ) | 10                                                    | 10                                                    | 10                                                    | 10                                                    | 10                                                    | 10                                                    |
| (sin θ/λ) <sub>max</sub> (Å <sup>-1</sup> )           | 0.625                                                 | 0.625                                                 | 0.625                                                 | 0.625                                                 | 0.625                                                 | 0.625                                                 |
| Detector distance (mm)                                | 645                                                   | 645                                                   | 645                                                   | 645                                                   | 645                                                   | 645                                                   |
| <u>Refinement</u>                                     |                                                       |                                                       |                                                       |                                                       |                                                       |                                                       |
| Refinement type                                       | kinematical                                           | kinematical                                           | dynamical                                             | dynamical                                             | dynamical                                             | dynamical                                             |
| R <sub>1</sub> ,                                      | 0.144,                                                | 0.102,                                                | 0.076,                                                | 0.097,                                                | 0.097,                                                | 0.122,                                                |
| wR <sub>2</sub> [F <sup>2</sup> >2σ(F <sup>2</sup> )] | 0.342                                                 | 0.236                                                 | 0.189                                                 | 0.241                                                 | 0.179                                                 | 0.230                                                 |
| R <sub>1</sub> , wR <sub>2</sub> [all]                | 0.170, 0.354                                          | 0.128, 0.249                                          | 0.113, 0.221                                          | 0.134, 0.268                                          | 0.126, 0.187                                          | 0.150, 0.237                                          |

|                                                                         |             |             |             |             |             |             |
|-------------------------------------------------------------------------|-------------|-------------|-------------|-------------|-------------|-------------|
| S                                                                       | 1.84        | 1.29        | 1.19        | 1.44        | 2.85        | 3.62        |
| No. of reflections                                                      | 1550        | 1550        | 2680        | 2680        | 2593        | 2593        |
| No. of parameters                                                       | 54          | 121         | 156         | 156         | 181         | 181         |
| No. of restraints                                                       | 0           | 0           | 0           | 0           | 0           | 0           |
| $\Delta\rho_{\max}, \Delta\rho_{\min}$<br>( $\text{e}\text{\AA}^{-3}$ ) | 0.23, -0.14 | 0.12, -0.11 | 0.09, -0.09 | 0.12, -0.12 | 0.13, -0.12 | 0.19, -0.16 |

Table S3: Clarithromycin.

| Dataset name                                                            | Clarithromycin (original)                                           | Clarithromycin (inverted)                                           |
|-------------------------------------------------------------------------|---------------------------------------------------------------------|---------------------------------------------------------------------|
| <u>Crystal data</u>                                                     |                                                                     |                                                                     |
| Chemical formula                                                        | C <sub>38</sub> NO <sub>13</sub> (H atoms excluded)                 | C <sub>38</sub> NO <sub>13</sub> (H atoms excluded)                 |
| M <sub>r</sub>                                                          | 678.4                                                               | 678.4                                                               |
| Crystal system, space group                                             | Orthorhombic, <i>P</i> 2 <sub>1</sub> 2 <sub>1</sub> 2 <sub>1</sub> | Orthorhombic, <i>P</i> 2 <sub>1</sub> 2 <sub>1</sub> 2 <sub>1</sub> |
| Temperature (K)                                                         | 293                                                                 | 293                                                                 |
| a, b, c (Å)                                                             | 8.8 (2), 20.1 (3), 23.91 (17)                                       | 8.8 (2), 20.1 (3), 23.91 (17)                                       |
| V (Å <sup>3</sup> )                                                     | 4230 (120)                                                          | 4230 (120)                                                          |
| Z                                                                       | 4                                                                   | 4                                                                   |
| Radiation type                                                          | Electrons, λ = 0.0251 Å                                             | Electrons, λ = 0.0251 Å                                             |
| <u>Data collection and processing</u>                                   |                                                                     |                                                                     |
| Diffractometer                                                          | Rigaku XtaLAB Synergy-ED                                            | Rigaku XtaLAB Synergy-ED                                            |
| Processing program                                                      | CrysAlis <sup>Pro</sup>                                             | CrysAlis <sup>Pro</sup>                                             |
| Processed data type                                                     | Virtual frame intensities                                           | Virtual frame intensities                                           |
| measured, independent, observed                                         | 20812, 6151, 1678                                                   | 20812, 6151, 1678                                                   |
| Total electron dose (e <sup>−</sup> /Å <sup>2</sup> )                   | 10                                                                  | 10                                                                  |
| (sin θ/λ) <sub>max</sub> (Å <sup>−1</sup> )                             | 0.625                                                               | 0.625                                                               |
| Detector distance (mm)                                                  | 645                                                                 | 645                                                                 |
| <u>Refinement</u>                                                       |                                                                     |                                                                     |
| Refinement type                                                         | dynamical                                                           | dynamical                                                           |
| R <sub>1</sub> , wR <sub>2</sub> [F <sup>2</sup> > 2σ(F <sup>2</sup> )] | 0.130, 0.220                                                        | 0.167, 0.275                                                        |
| R <sub>1</sub> , wR <sub>2</sub> [all]                                  | 0.271, 0.257                                                        | 0.311, 0.313                                                        |
| S                                                                       | 1.95                                                                | 2.37                                                                |
| No. of reflections                                                      | 6151                                                                | 6151                                                                |
| No. of parameters                                                       | 241                                                                 | 241                                                                 |
| No. of restraints                                                       | 0                                                                   | 0                                                                   |
| Δρ <sub>max</sub> , Δρ <sub>min</sub> (e Å <sup>−3</sup> )              | 0.17, -0.17                                                         | 0.25, -0.18                                                         |

Table S4: Thaumatin.

| Dataset name                                         | Thaumatin                       |
|------------------------------------------------------|---------------------------------|
| <u>Crystal data</u>                                  |                                 |
| Crystal system, space group                          | Tetragonal, $P4_12_12$          |
| Temperature (K)                                      | 100                             |
| a, b, c (Å)                                          | 58.40(15), 58.40(15), 151.2(2)  |
| $\alpha$ , $\beta$ , $\gamma$ (°)                    | 90, 90, 90                      |
| <u>Data collection and processing</u>                |                                 |
| Radiation type                                       | Electrons, $\lambda = 0.0251$ Å |
| Diffractionmeter                                     | Rigaku XtaLAB Synergy-ED        |
| Detector distance (mm)                               | 1800                            |
| Total electron dose ( $e^-/(\text{Å}^2\text{s})$ )   | 10                              |
| Resolution range (Å)                                 | 16.14–2.15 (2.22–2.15)          |
| # unique reflections                                 | 12870 (1081)                    |
| $I/\sigma_I$                                         | 3.5 (1.2)                       |
| $CC_{1/2}$                                           | 0.972 (0.603)                   |
| Completeness (%)                                     | 86.2 (86.0)                     |
| Multiplicity                                         | 6.4 (6.1)                       |
| $R_{\text{int}}$                                     | 0.43 (1.90)                     |
| $R_{\text{pim}}$                                     | 0.17 (0.74)                     |
| <u>Refinement</u>                                    |                                 |
| $R_{\text{work}}$ , $R_{\text{free}}$ (%)            | 19.5, 22.6                      |
| # atoms (protein, ligand, water)                     | 1558, 10, 23                    |
| B-factors (protein, ligand, water) (Å <sup>2</sup> ) | 23.8, 7.2, 15.0                 |
| RMS bonds, angles                                    | 0.01, 1.86                      |
| Ramachandran outliers, favored (%)                   | 0.0, 96.1                       |
| Rotamer outliers (%)                                 | 3.57                            |
| C $\beta$ deviations                                 | 3                               |
| Clashscore                                           | 2.62                            |
| MolProbity score                                     | 1.73                            |

*Table S5: Cystine.*

|                                                          | Cystine (1,<br>653mm)                                                       | Cystine (1,<br>1029mm)                                                      | Cystine (1,<br>1289mm)                                                      | Cystine (2,<br>777mm)                                                       | Cystine (2,<br>1029mm)                                                      | Cystine (2,<br>1289mm)                                                      |
|----------------------------------------------------------|-----------------------------------------------------------------------------|-----------------------------------------------------------------------------|-----------------------------------------------------------------------------|-----------------------------------------------------------------------------|-----------------------------------------------------------------------------|-----------------------------------------------------------------------------|
| <i>Crystal data</i>                                      |                                                                             |                                                                             |                                                                             |                                                                             |                                                                             |                                                                             |
| Chemical formula                                         | C <sub>6</sub> H <sub>12</sub> N <sub>2</sub> O <sub>4</sub> S <sub>2</sub> | C <sub>6</sub> H <sub>12</sub> N <sub>2</sub> O <sub>4</sub> S <sub>2</sub> | C <sub>6</sub> H <sub>12</sub> N <sub>2</sub> O <sub>4</sub> S <sub>2</sub> | C <sub>6</sub> H <sub>12</sub> N <sub>2</sub> O <sub>4</sub> S <sub>2</sub> | C <sub>6</sub> H <sub>12</sub> N <sub>2</sub> O <sub>4</sub> S <sub>2</sub> | C <sub>6</sub> H <sub>12</sub> N <sub>2</sub> O <sub>4</sub> S <sub>2</sub> |
| M <sub>r</sub>                                           | 240.30                                                                      | 240.30                                                                      | 240.30                                                                      | 240.30                                                                      | 240.30                                                                      | 240.30                                                                      |
| Crystal system,                                          | Hexagonal,                                                                  | Hexagonal,                                                                  | Hexagonal,                                                                  | Hexagonal,                                                                  | Hexagonal,                                                                  | Hexagonal,                                                                  |
| space group                                              | <i>P</i> 6 <sub>1</sub> 22                                                  |
| Temperature (K)                                          | 293                                                                         | 293                                                                         | 293                                                                         | 293                                                                         | 293                                                                         | 293                                                                         |
| a, b, c (Å)                                              | 5.44 (8),                                                                   | 5.42 (10),                                                                  | 5.46 (10),                                                                  | 5.5 (12),                                                                   | 5.4 (9),                                                                    | 5.5 (8),                                                                    |
|                                                          | 5.44 (8),                                                                   | 5.42 (10), 56.41                                                            | 5.46 (10), 56.91                                                            | 5.5 (12),                                                                   | 5.4 (9),                                                                    | 5.5 (8),                                                                    |
|                                                          | 56.60 (13)                                                                  | (14)                                                                        | (13)                                                                        | 58.5 (10)                                                                   | 56.6 (7)                                                                    | 57.2 (7)                                                                    |
| α, β, γ (°)                                              | 90, 90, 120                                                                 | 90, 90, 120                                                                 | 90, 90, 120                                                                 | 90, 90, 120                                                                 | 90, 90, 120                                                                 | 90, 90, 120                                                                 |
| V (Å <sup>3</sup> )                                      | 1449 (44)                                                                   | 1436 (52)                                                                   | 1470 (56)                                                                   | 1532 (659)                                                                  | 1451 (501)                                                                  | 1501 (462)                                                                  |
| Z                                                        | 6                                                                           | 6                                                                           | 6                                                                           | 6                                                                           | 6                                                                           | 6                                                                           |
| Radiation type                                           | Electrons,                                                                  | Electrons,                                                                  | Electrons,                                                                  | Electrons,                                                                  | Electrons,                                                                  | Electrons,                                                                  |
|                                                          | λ = 0.0251 Å                                                                |
| <i>Data collection and<br/>processing</i>                |                                                                             |                                                                             |                                                                             |                                                                             |                                                                             |                                                                             |
| Diffractometer                                           | Rigaku XtaLAB<br>Synergy-ED                                                 | Rigaku<br>XtaLAB Synergy-<br>ED                                             | Rigaku<br>XtaLAB Synergy-<br>ED                                             | Rigaku XtaLAB<br>Synergy-ED                                                 | Rigaku XtaLAB<br>Synergy-ED                                                 | Rigaku XtaLAB<br>Synergy-ED                                                 |
|                                                          | 7866,                                                                       | 6143,                                                                       | 4983,                                                                       | 2731,                                                                       | 2448,                                                                       | 2211,                                                                       |
| measured, inde-                                          | 880,                                                                        | 882,                                                                        | 877,                                                                        | 393,                                                                        | 375,                                                                        | 365,                                                                        |
| pendent, observed                                        | 818                                                                         | 669                                                                         | 571                                                                         | 251                                                                         | 261                                                                         | 148                                                                         |
| Resolution (Å)                                           | 0.80                                                                        | 0.80                                                                        | 0.80                                                                        | 1.10                                                                        | 1.10                                                                        | 1.10                                                                        |
| Completeness (%)                                         | 79.2                                                                        | 79.6                                                                        | 77.7                                                                        | 99.5                                                                        | 99.5                                                                        | 92.3                                                                        |
| Redundancy                                               | 12.6                                                                        | 9.9                                                                         | 8.1                                                                         | 3.5                                                                         | 3.3                                                                         | 3.1                                                                         |
| R <sub>int</sub>                                         | 0.133                                                                       | 0.162                                                                       | 0.121                                                                       | 0.505                                                                       | 0.286                                                                       | 0.462                                                                       |
| R <sub>pim</sub>                                         | 0.040                                                                       | 0.055                                                                       | 0.044                                                                       | 0.307                                                                       | 0.146                                                                       | 0.174                                                                       |
| CC <sub>1/2</sub>                                        | 0.998                                                                       | 0.995                                                                       | 0.998                                                                       | 0.472                                                                       | 0.952                                                                       | 0.940                                                                       |
| I/σ(I) [inf - 0.80 Å]                                    | 13.96                                                                       | 10.25                                                                       | 11.29                                                                       | 2.45                                                                        | 3.69                                                                        | 2.73                                                                        |
| Total electron dose<br>(e <sup>-</sup> /Å <sup>2</sup> ) | 0.8                                                                         | 0.8                                                                         | 0.8                                                                         | 0.8                                                                         | 0.8                                                                         | 0.8                                                                         |
| Min, Max collec-<br>tion angle (°)                       | -55, +70                                                                    | -55, +70                                                                    | -55, +70                                                                    | -55, +55                                                                    | -55, +55                                                                    | -55, +55                                                                    |
| (sin θ/λ) <sub>max</sub> (Å <sup>-1</sup> )              | 0.624                                                                       | 0.624                                                                       | 0.624                                                                       | 0.454                                                                       | 0.454                                                                       | 0.454                                                                       |
| Detector distance<br>(mm)                                | 653                                                                         | 1029                                                                        | 1289                                                                        | 777                                                                         | 1029                                                                        | 1289                                                                        |
| <i>Refinement</i>                                        |                                                                             |                                                                             |                                                                             |                                                                             |                                                                             |                                                                             |

|                                                                   |              |              |              |              |              |              |
|-------------------------------------------------------------------|--------------|--------------|--------------|--------------|--------------|--------------|
| R <sub>1</sub> ,                                                  | 0.164,       | 0.140,       | 0.122,       | 0.288,       | 0.227,       | 0.233,       |
| wR <sub>2</sub> [ $F^2 > 2\sigma(F^2)$ ]                          | 0.403        | 0.362        | 0.343        | 0.603        | 0.433        | 0.481        |
| R <sub>1</sub> , wR <sub>2</sub> [all]                            | 0.170, 0.406 | 0.160, 0.374 | 0.154, 0.365 | 0.308, 0.621 | 0.250, 0.443 | 0.292, 0.515 |
| S                                                                 | 1.19         | 1.18         | 1.15         | 1.03         | 1.87         | 1.22         |
| No. of reflections                                                | 880          | 882          | 877          | 393          | 375          | 365          |
| No. of parameters                                                 | 66           | 66           | 66           | 66           | 66           | 66           |
| No. of restraints                                                 | 75           | 39           | 0            | 75           | 75           | 75           |
| $\Delta\rho_{\max}$ , $\Delta\rho_{\min}$<br>(e Å <sup>-3</sup> ) | 0.22, -0.18  | 0.20, -0.17  | 0.12, -0.15  | 0.14, -0.10  | 0.16, -0.17  | 0.15, -0.11  |
| CCDC number                                                       | -            | -            | 2267655      | -            | -            | -            |
